# Supplementary material for: Building a Bridge to Community: A Pragmatic Randomized Trial Examining a Combined Physical Therapy and Resistance Exercise Intervention for People after Head and Neck Cancer
Source: MDPI journal article supplement (doi:10.3390/cancers16091758), 2024-05-01
Supplement: s1 [file s1]

Table S1. Quality of Life: Fatigue, Physical Functioning, and Body Composition Outcomes T0 to T4

|                             | <b>T0:<br/>Baseline</b> | <b>T1:<br/>End of PrCT</b> | <b>T3:<br/>24-week Follow-up</b> | <b>T4:<br/>One-year Follow-up</b> | <b>Adjusted between-group mean<br/>difference: T0 to T4</b> |
|-----------------------------|-------------------------|----------------------------|----------------------------------|-----------------------------------|-------------------------------------------------------------|
| <b>Outcome</b>              | <b>Mean (SD)</b>        | <b>Mean (SD)</b>           | <b>Mean (SD)</b>                 | <b>Mean (SD)</b>                  | <b>REHAB vs TARGET<br/>Mean Change [95% CI]</b>             |
| FACT-F (0-160)              |                         |                            |                                  |                                   |                                                             |
| REHAB Group                 | 116.4 (21.4)            | 119.4 (20.6)               | 122.7 (19.3)                     | 122.1 (24.4)                      |                                                             |
| TARGET Group                | 107.3 (25.2)            | 117.5 (20.3)               | 120.1 (21.3)                     | 123.2 (21.0)*                     | +7.5 [-3.8, 18.8]                                           |
| Trial Outcome Index         |                         |                            |                                  |                                   |                                                             |
| REHAB Group                 | 76.3 (19.0)             | 79.5 (18.5)                | 83.0 (16.8)                      | 80.7 (22.4)                       |                                                             |
| TARGET Group                | 68.6 (20.9)             | 78.5 (14.6)                | 79.8 (19.1)                      | 84.7 (14.8)*                      | +8.2 [0.7, 15.8]†                                           |
| Six-Minute Walk Test (m)    |                         |                            |                                  |                                   |                                                             |
| REHAB Group                 | 485.4 (96.1)            | 512.8 (92.4)               | 537.9 (96.4)                     | 542.9 (112.4)*                    |                                                             |
| TARGET Group                | 484.2 (100.4)           | 543.0 (91.5)               | 551.3 (108.7)                    | 561.1 (132.2)*                    | +15.1 [-31.3, 61.6]                                         |
| 1-RM Leg Press (lbs)        |                         |                            |                                  |                                   |                                                             |
| REHAB Group                 | 134.2 (48.9)            | 156.6 (57.2)               | 182.0 (67.4)                     | 189.6 (79.2)                      |                                                             |
| TARGET Group                | 150.9 (53.1)            | 190.8 (80.4)               | 204.9 (68.1)                     | 222.4 (80.0)*                     | +24.9 [41, 45.7]†                                           |
| Lower Body Flexibility (cm) |                         |                            |                                  |                                   |                                                             |
| REHAB Group                 | 13.7 (12.0)             | 16.0 (11.9)                | 17.4 (11.1)                      | 18.3 (11.6)*                      |                                                             |
| TARGET Group                | 10.6 (11.6)             | 12.1 (12.4)                | 14.2 (11.9)                      | 13.7 (12.8)*                      | -0.6 [-4.7, 3.6]                                            |
| Body Mass Index             |                         |                            |                                  |                                   |                                                             |
| REHAB Group                 | 24.3 (4.1)              | 24.7 (4.4)                 | 24.8 (4.2)                       | 25.0 (4.1)*                       |                                                             |
| TARGET Group                | 25.1 (5.4)              | 25.7 (6.3)                 | 25.9 (6.7)                       | 26.2 (6.3)*                       | -0.08 [-1.0, 0.9]                                           |

<sup>†</sup>Adjusting for time from treatment and baseline score; SD: standard deviation; CI: confidence interval; 1-RM: one-repetition maximum; \* significant within group change  $p < 0.05$ ; † significant between group change  $p < 0.05$

Table S2. Neck Dissection and Upper Extremity Outcomes T0 to T4

|                                     | <b>T0:<br/>Baseline</b> | <b>T1: 12-week<br/>End of RCT</b> | <b>T3:<br/>24-week Follow-up</b> | <b>T4:<br/>One-year Follow-up</b> | <b>Adjusted between-group<br/>mean difference: T0 to T4</b> |
|-------------------------------------|-------------------------|-----------------------------------|----------------------------------|-----------------------------------|-------------------------------------------------------------|
| <b>Outcome</b>                      | <b>Mean (SD)</b>        | <b>Mean (SD)</b>                  | <b>Mean (SD)</b>                 | <b>Mean (SD)</b>                  | <b>REHAB vs TARGET<br/>Mean Change [95% CI]</b>             |
| NDII (0-100)                        |                         |                                   |                                  |                                   |                                                             |
| REHAB Group                         | 55.6 (23.0)             | 69.3 (20.1)                       | 68.8 (20.4)                      | 72.1 (21.0)*                      |                                                             |
| TARGET Group                        | 52.6 (21.2)             | 65.5 (20.3)                       | 68.4 (19.4)                      | 70.3 (23.6)*                      | +2.5 [-7.0, 12.1]                                           |
| Active Shoulder Abduction (Degrees) |                         |                                   |                                  |                                   |                                                             |
| REHAB Group                         | 108.7 (38.9)            | 135.6 (32.4)                      | 138.5 (31.6)                     | 139.6 (27.9)*                     |                                                             |
| TARGET Group                        | 107.7 (33.9)            | 128.8 (33.4)                      | 131.4 (33.3)                     | 134.5 (31.0)*                     | -1.0 [-15.3, 13.3]                                          |
| 1 RM Bench Press (lbs)              |                         |                                   |                                  |                                   |                                                             |
| REHAB Group                         | 91.2 (46.6)             | 90.1 (35.7)                       | 103.3 (38.5)                     | 100.8 (43.2)                      |                                                             |
| TARGET Group                        | 90.5 (48.4)             | 105.6 (47.3)                      | 110.1 (46.3)                     | 120.5 (47.9)*                     | +23.6 [6.6, 40.6]†                                          |
| 1 RM Seated Row (lbs)               |                         |                                   |                                  |                                   |                                                             |
| REHAB Group                         | 93.7 (46.6)             | 123.9 (54.9)                      | 134.1 (60.7)                     | 144.1 (62.4)*                     |                                                             |
| TARGET Group                        | 98.0 (57.7)             | 144.1 (63.8)                      | 153.2 (66.3)                     | 161.8 (76.0)*                     | +11.4 [-14.0, 36.8]                                         |
| UE Endurance (reps @ 50% 1RM)       |                         |                                   |                                  |                                   |                                                             |
| REHAB Group                         | 20.1 (5.6)              | 29.9 (10.1)                       | 32.0 (15.2)                      | 32.1 (14.3)*                      |                                                             |
| TARGET Group                        | 21.0 (9.3)              | 31.6 (14.0)                       | 36.0 (16.0)                      | 33.2 (14.9)*                      | -0.08 [-8.5, 8.4]                                           |
| Grip Strength (kgs)                 |                         |                                   |                                  |                                   |                                                             |
| REHAB Group                         | 65.7 (21.6)             | 69.7 (21.6)                       | 71.1 (22.0)                      | 72.7 (24.8)*                      |                                                             |
| TARGET Group                        | 73.6 (24.3)             | 78.3 (27.8)                       | 81.5 (27.3)                      | 83.0 (26.5)*                      | +1.22 [-4.0, 6.5]                                           |
| Physical Activity Minutes/ Week     |                         |                                   |                                  |                                   |                                                             |
| REHAB Group                         | 49.9 (141.5)            | 96.4 (124.1)                      | 184.8 (172.7)                    | 127.6 (122.7)*                    |                                                             |
| TARGET Group                        | 67.9 (103.6)            | 149.7 (130.0)                     | 147.3 (132.1)                    | 197.3 (203.1)*                    | +34.9 [-58.1, 127.9]                                        |

<sup>1</sup>Adjusting for time from treatment and baseline score; SD: standard deviation; CI: confidence interval; 1-RM: one-repetition maximum; \* significant within group change  $p < 0.05$ ; † significant between group change  $p < 0.05$
